# Supplementary figures and images for: Severe non-hepatic hyperammonaemic encephalopathy in an immunocompromised adolescent with enterocolitis
Source: PubMed Central journal article supplement — BMJ Case Rep. 2024 Jun 19;17(6):e256225. doi: 10.1136/bcr-2023-256225 (PMC11191012; doi:10.1136/bcr-2023-256225), 2024-06-19

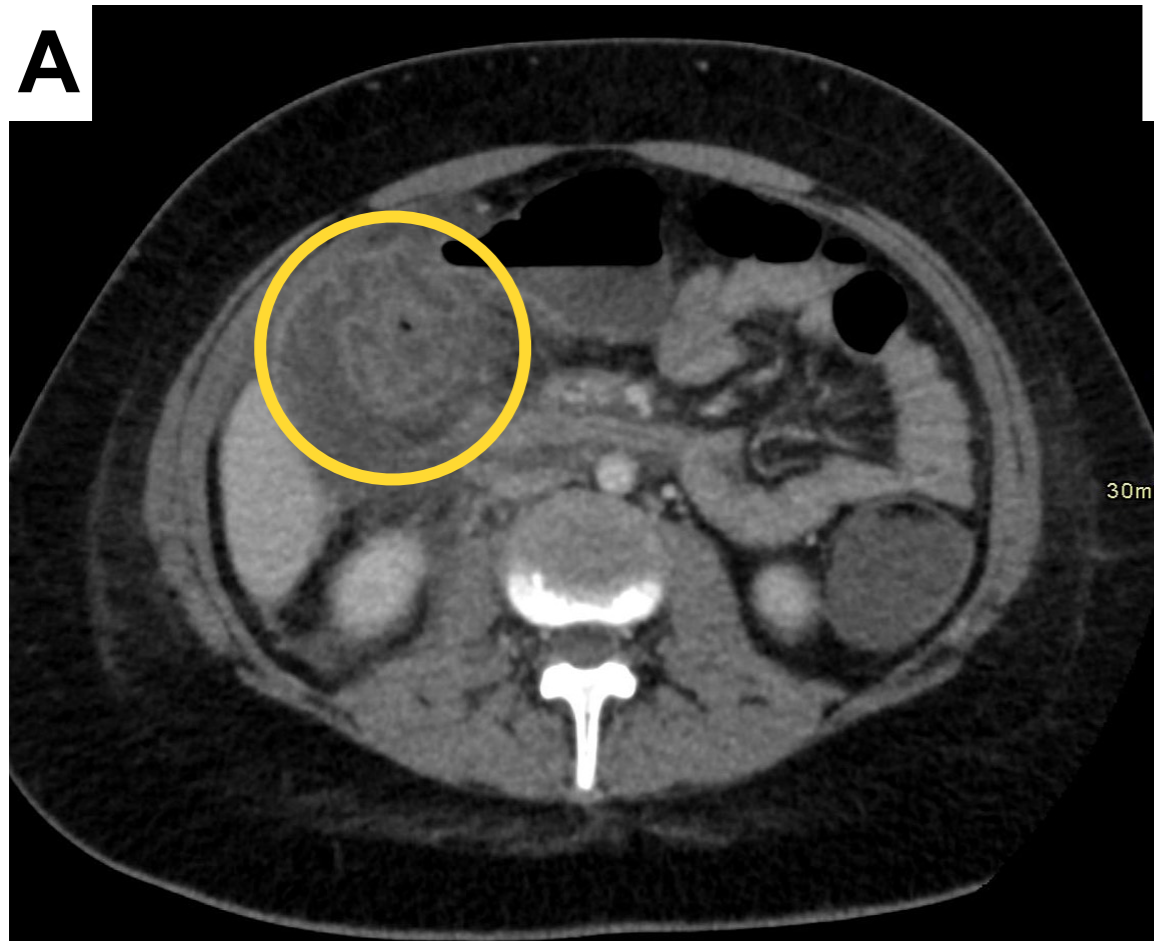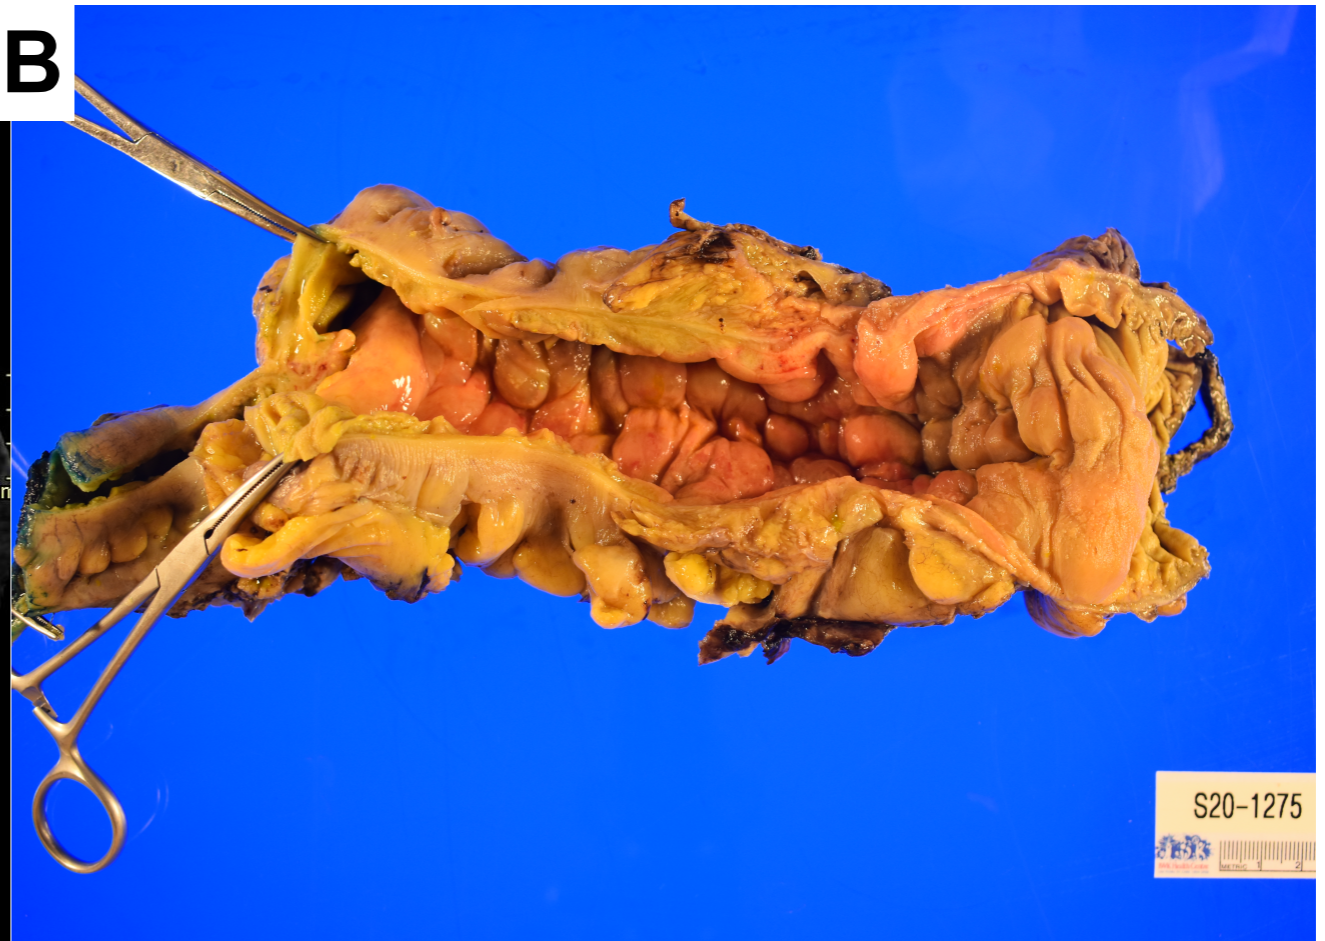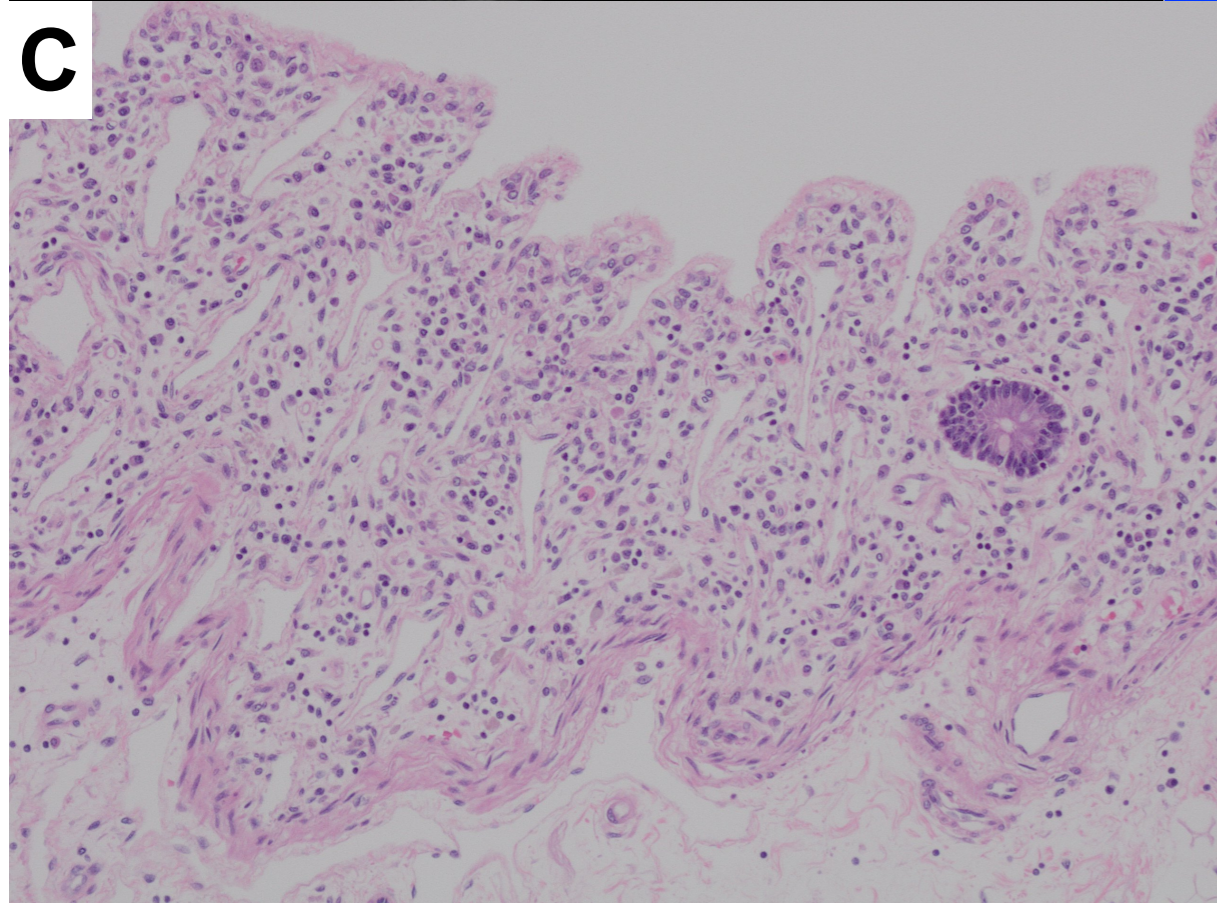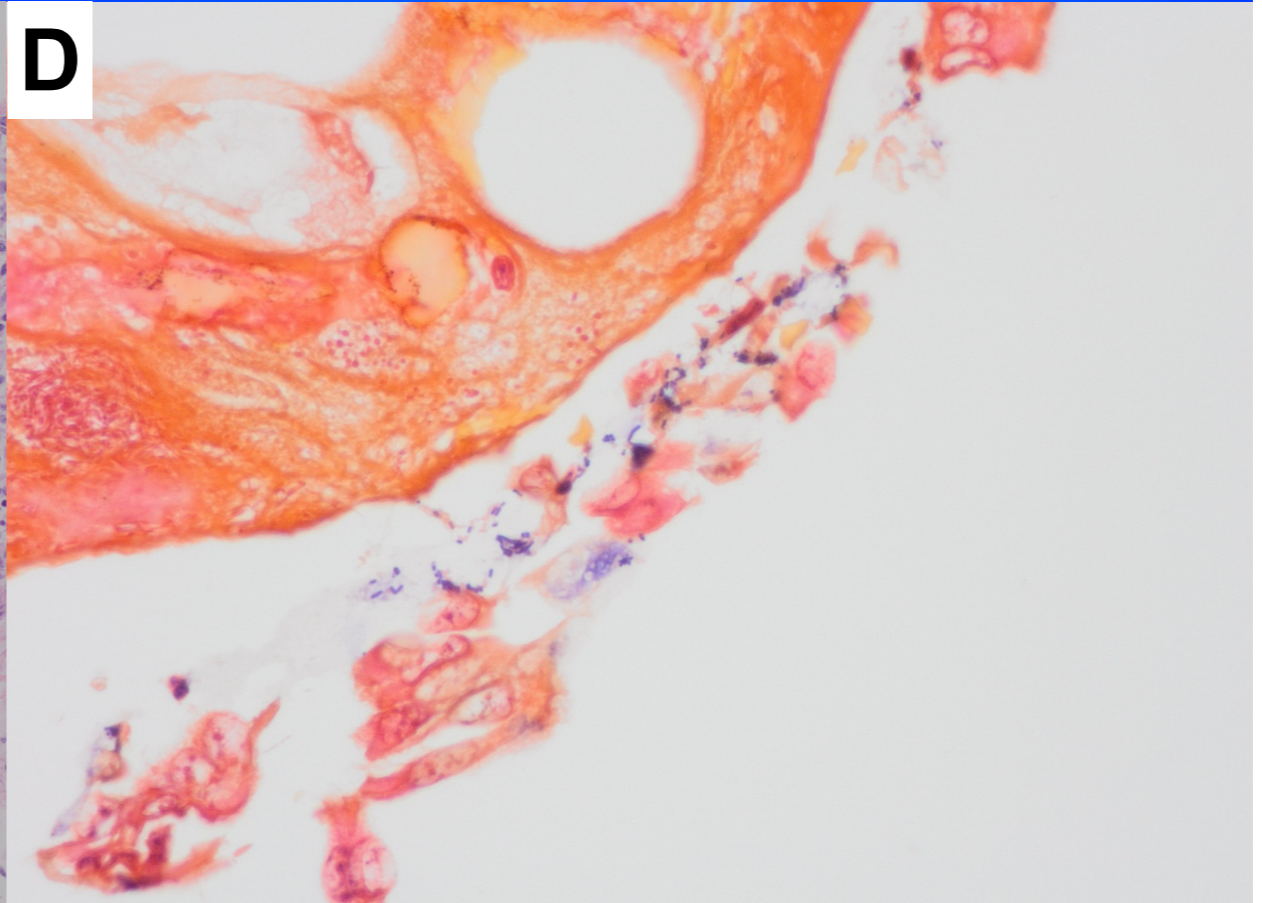

Supplement: bcr-2023-256225supp001.pdf [file bcr-2023-256225supp001.pdf]
